# Supplementary material for: Molecular interactions of DNA with transfectants: a study based on infrared spectroscopy and quantum chemistry as aids to fluorescence spectroscopy and dynamic light scattering analyses
Source: Royal Society of Chemistry journal article supplement (doi:10.1039/c4ra08845j), 2014-09-30
Supplement: c4ra08845j1.pdf [file c4ra08845j1.pdf]

## Supporting Information

### **Molecular interactions of DNA with transfectants: a study based on infrared spectroscopy and quantum chemistry in aid to fluorescence spectroscopy and dynamic light scattering analyses**

A. Lucotti,<sup>ab</sup> M. Tommasini,<sup>ab\*</sup> D. Pezzoli,<sup>b</sup> G. Candiani<sup>abc\*</sup>

<sup>a</sup> Department of Chemistry, Materials, and Chemical Engineering "G. Natta", Politecnico di Milano, via Mancinelli 7, 20131 Milano, Italy. E-mail: [matteo.tommasini@polimi.it](mailto:matteo.tommasini@polimi.it); [gabriele.candiani@polimi.it](mailto:gabriele.candiani@polimi.it).

<sup>b</sup> Research Unit Milano Politecnico, National Interuniversity Consortium of Materials Science and Technology - INSTM, via Mancinelli 7, 20131 Milano, Italy.

<sup>c</sup> Centro Interuniversitario di Ricerca in Biotecnologie Proteiche "The Protein Factory", Politecnico di Milano, CNR-ICRM Milano, and Università degli Studi dell'Insubria, Milano - Italy.

## Content

1. Cartesian coordinates of the molecular models described in the text.
2. Figure SI.1, reporting the simulated anti-symmetric PO stretching IR signal of all models.
3. Vibrational analysis of the molecular models considered in this work (included text files: dna-ca-gt.txt, model-a.txt, model-b.txt, model-W1.txt, model-W2.txt, model-W3.txt).

## 1. Cartesian coordinates of the molecular models described in the text

### DNA-CA/GT

fully optimized ad B97D/6- 31+G(d,p) level, xyz format

125

DNA CA/GT

```
H -8.511915 -5.079890 -0.023321
O -8.120562 -4.196873 0.028353
C -8.845435 -3.460359 1.035372
H -8.797757 -3.990179 2.004526
H -9.906278 -3.344006 0.739654
C -8.251498 -2.064609 1.221357
H -8.904034 -1.526014 1.929609
O -6.927830 -2.173534 1.794888
C -6.002403 -1.453387 0.936957
H -5.884332 -0.425827 1.287895
N -4.682676 -2.079020 1.030542
C -4.500175 -3.357666 0.583114
H -5.398125 -3.858540 0.224728
C -3.270731 -3.958424 0.613361
H -3.135190 -4.983260 0.272871
C -2.179097 -3.200133 1.179694
N -0.954155 -3.741339 1.315488
H -0.166785 -3.149280 1.664214
H -0.697582 -4.530586 0.735960
N -2.361519 -1.945749 1.627390
C -3.575293 -1.328300 1.560209
O -3.748576 -0.154657 1.929381
C -8.115118 -1.221719 -0.079031
H -8.800704 -1.557041 -0.873107
C -6.649349 -1.478752 -0.443185
H -6.568891 -2.474091 -0.898478
H -6.235354 -0.737888 -1.120386
O -8.416533 0.137537 0.281569
P -7.890233 1.447620 -0.658916
O -8.688338 2.641149 -0.188428
O -7.736451 1.012660 -2.103932
O -6.295319 1.578144 -0.110649
C -5.925048 2.455920 0.958344
H -5.338799 1.873446 1.685575
H -6.820439 2.883894 1.439645
C -5.061290 3.606725 0.427613
H -4.881684 4.320494 1.247509
O -3.757524 3.149578 -0.013806
C -3.712065 3.041261 -1.440700
H -2.841896 3.619533 -1.778604
N -3.422655 1.653208 -1.829797
C -4.296406 0.601091 -2.084478
H -5.358361 0.771364 -2.232476
N -3.705780 -0.582072 -2.131315
C -2.370992 -0.300293 -1.881404
C -1.229449 -1.125967 -1.759218
N -1.273649 -2.480245 -1.890924
H -0.467429 -3.026366 -1.557826
H -2.192497 -2.900805 -1.818902
N -0.034507 -0.525459 -1.531420
C 0.027596 0.823619 -1.413888
H 1.024633 1.229013 -1.239878
N -0.990189 1.698070 -1.474231
C -2.163784 1.078289 -1.702633
C -5.681422 4.322205 -0.784607
H -6.777881 4.227956 -0.778299
C -5.052593 3.586851 -1.986148
H -5.729050 2.786086 -2.303261
H -4.884345 4.266818 -2.834007
O -5.290929 5.718102 -0.725309
H -5.728907 6.156325 -1.469919
H 8.457272 -4.917107 -0.304648
O 8.084107 -4.024744 -0.306328
C 8.729694 -3.285807 -1.364122
H 8.603277 -3.811913 -2.328260
H 9.811127 -3.175719 -1.152314
C 8.131304 -1.885177 -1.500848
```

H 8.736685 -1.350830 -2.252594  
O 6.771512 -1.974130 -1.983492  
C 5.894540 -1.316499 -1.030148  
H 5.680955 -0.295310 -1.354559  
N 4.614236 -2.027622 -1.004149  
C 4.579043 -3.357869 -0.648070  
H 5.556114 -3.792166 -0.439513  
C 3.427704 -4.091270 -0.581363  
C 3.407832 -5.540684 -0.170433  
H 2.821749 -5.672507 0.753491  
H 2.932130 -6.165320 -0.944463  
H 4.430706 -5.905944 0.006750  
C 2.171406 -3.427607 -0.911001  
O 1.057766 -4.006475 -0.933203  
N 2.274812 -2.081175 -1.235076  
H 1.385636 -1.521869 -1.388313  
C 3.433218 -1.319787 -1.322934  
O 3.418400 -0.137257 -1.659805  
C 8.091410 -1.043677 -0.194691  
H 8.840549 -1.372913 0.543082  
C 6.661935 -1.317541 0.287888  
H 6.630543 -2.310453 0.753412  
H 6.293625 -0.578109 0.994053  
O 8.358114 0.313123 -0.585230  
P 7.879470 1.635338 0.366674  
O 8.641240 2.824556 -0.172096  
O 7.819053 1.221255 1.823366  
O 6.257228 1.743682 -0.091968  
C 5.819087 2.595295 -1.155798  
H 5.214831 1.989720 -1.849676  
H 6.682061 3.037521 -1.681582  
C 4.945193 3.729910 -0.605517  
H 4.728948 4.433388 -1.426499  
O 3.670885 3.247432 -0.124798  
C 3.654439 3.174464 1.304428  
H 2.791029 3.760557 1.648049  
N 3.386427 1.801705 1.748714  
C 4.286519 0.759265 1.982952  
H 5.355115 0.938293 2.012840  
N 3.703510 -0.407398 2.168210  
C 2.346515 -0.136735 2.049704  
C 1.210623 -1.001828 2.121956  
O 1.185877 -2.248763 2.265092  
N -0.001979 -0.284259 1.995787  
H -0.867972 -0.862389 1.965990  
C -0.108593 1.077039 1.770598  
N -1.368730 1.589575 1.716201  
H -2.178568 0.962589 1.728190  
H -1.479800 2.455553 1.202573  
N 0.947872 1.881966 1.646693  
C 2.123941 1.229245 1.790709  
C 5.590591 4.470777 0.578627  
H 6.687832 4.394749 0.542299  
C 5.005965 3.742808 1.804139  
H 5.700196 2.951905 2.106757  
H 4.856632 4.427231 2.652604  
O 5.178907 5.862200 0.511951  
H 5.602138 6.306306 1.262163

---

**Model (a)**

optimized ad B97D/6- 31+G(d,p) level including IEFPCM water solvation (see text), xyz format

37

```
model (a)
H -6.101318  0.428169  1.206831
O -5.162114  0.498333  0.986534
C -4.967914 -0.144150 -0.290766
H -5.608126  0.329262 -1.057749
H -5.220767 -1.220238 -0.223918
C -3.512418 -0.028463 -0.742039
H -3.412817 -0.616422 -1.670418
O -3.202315  1.355140 -1.028996
C -2.040806  1.741033 -0.248328
H -1.125218  1.579127 -0.841658
H -2.147408  2.803815  0.009854
C -2.456355 -0.526792  0.285780
H -2.877515 -1.240600  1.011132
C -2.049616  0.791717  0.951499
H -2.831106  1.081540  1.665496
H -1.093793  0.740894  1.464087
O -1.410751 -1.172366 -0.484283
P  0.138888 -1.380463  0.110677
O  0.795038 -2.375242 -0.834166
O  0.101773 -1.594821  1.614981
O  0.788006  0.147848 -0.117147
C  1.519882  0.485948 -1.314647
H  1.086997  1.401659 -1.745841
H  1.467521 -0.343485 -2.039790
C  2.993239  0.742132 -0.974430
H  3.553967  0.877276 -1.913209
O  3.170890  1.961311 -0.209079
C  3.351148  1.665480  1.191129
H  4.280432  2.173114  1.492826
H  2.508693  2.083495  1.766316
C  3.623426 -0.375012 -0.125484
H  3.110385 -1.333941 -0.294022
C  3.429167  0.129683  1.319308
H  2.502724 -0.295204  1.720042
H  4.266261 -0.167416  1.967838
O  5.023477 -0.476417 -0.491655
H  5.387214 -1.213852  0.020395
```

---

**Model (b)**

optimized ad B97D/6- 31+G(d,p) level including IEFPCM water solvation (see text), xyz format

48

```
model (b)
H 6.261584 0.793375 1.234324
O 5.379056 0.431612 1.073582
C 5.205393 0.332836 -0.355423
H 5.997570 -0.301817 -0.793537
H 5.249649 1.337155 -0.819927
C 3.850470 -0.285938 -0.697139
H 3.742827 -0.245637 -1.794546
O 3.829221 -1.669633 -0.275495
C 2.683109 -1.869525 0.589296
H 1.819583 -2.207952 -0.008165
H 2.960758 -2.632977 1.332207
C 2.619966 0.406688 -0.044349
H 2.826072 1.449704 0.243164
C 2.392978 -0.488921 1.177732
H 3.135373 -0.233250 1.944530
H 1.395721 -0.402514 1.598361
O 1.551768 0.382049 -1.032362
P -0.043932 0.487870 -0.615599
O -0.813462 0.812256 -1.884536
O -0.215799 1.397687 0.611069
O -0.382096 -1.042625 -0.073898
C -0.916340 -2.053741 -0.960053
H -0.281333 -2.950243 -0.890143
H -0.940572 -1.678625 -1.996996
C -2.345698 -2.420181 -0.541975
H -2.771401 -3.099463 -1.297834
O -2.377145 -3.135513 0.719365
C -2.749873 -2.259082 1.791679
H -3.600969 -2.740553 2.306558
H -1.906152 -2.160039 2.496384
C -3.253866 -1.194411 -0.345423
H -2.909323 -0.347473 -0.957904
C -3.122719 -0.898265 1.162874
H -2.336091 -0.150365 1.308638
H -4.062916 -0.511906 1.582794
O -4.603010 -1.575619 -0.718264
H -5.146365 -0.778504 -0.630626
H -3.141680 2.766404 0.199363
N -2.233329 2.945452 -0.238524
H -2.248299 2.552059 -1.188402
H -1.470435 2.374002 0.259536
C -1.902813 4.415664 -0.241201
C -1.826420 4.940248 1.191594
H -2.676922 4.926922 -0.825506
H -0.941635 4.510011 -0.760157
H -1.574975 6.009335 1.171412
H -2.791156 4.822098 1.707114
H -1.050008 4.410093 1.761656
```

---

## Model W<sub>1</sub>

optimized ad B97D/6- 31+G(d,p) level including IEFPCM water solvation (see text), xyz format

51

```
model W1
H 6.387654 1.591513 1.303265
O 5.577390 1.112799 1.079966
C 5.244563 1.438541 -0.285711
H 6.080817 1.169986 -0.957164
H 5.036269 2.521713 -0.384374
C 4.000555 0.675472 -0.739163
H 3.747795 1.038364 -1.750071
O 4.298282 -0.738435 -0.810538
C 3.331667 -1.453607 -0.000864
H 2.479585 -1.767389 -0.627507
H 3.842790 -2.331868 0.422538
C 2.754094 0.831347 0.178454
H 2.792030 1.746531 0.790004
C 2.860631 -0.433855 1.035825
H 3.632278 -0.277267 1.800375
H 1.927353 -0.710528 1.516845
O 1.595510 0.884191 -0.700613
P 0.076917 0.499815 -0.185878
O -0.856115 1.004261 -1.287436
O -0.126502 0.935023 1.262155
O 0.096446 -1.156684 -0.168777
C -0.334175 -1.931637 -1.313697
H 0.464113 -2.638333 -1.587761
H -0.562015 -1.260923 -2.159183
C -1.601740 -2.720937 -0.963877
H -1.982824 -3.200692 -1.879613
O -1.334343 -3.788977 -0.019709
C -1.727514 -3.406334 1.305405
H -2.397940 -4.203651 1.674319
H -0.835245 -3.351677 1.952818
C -2.694748 -1.856656 -0.312520
H -2.599632 -0.804401 -0.620528
C -2.430893 -2.035300 1.196883
H -1.789675 -1.217443 1.542339
H -3.366061 -2.022695 1.775568
O -3.982527 -2.389653 -0.715080
H -4.652503 -1.804268 -0.331936
H -3.981903 1.893832 -0.899767
N -3.123695 2.266529 -0.484510
H -2.281511 1.757643 -0.887794
H -3.113890 2.046181 0.544803
C -3.010470 3.750006 -0.710668
C -4.188400 4.493272 -0.082049
H -2.959526 3.908221 -1.794605
H -2.055448 4.053367 -0.265164
H -4.072405 5.571988 -0.255629
H -5.140526 4.172124 -0.530047
H -4.228567 4.317811 1.002851
O -2.547853 1.653240 2.173266
H -1.637345 1.334305 1.902406
H -3.005292 0.876637 2.528777
```

---

## Model W<sub>2</sub>

optimized ad B97D/6- 31+G(d,p) level including IEFPCM water solvation (see text), xyz format

54

```
model W2
H -4.987075 3.105536 1.428909
O -4.076097 2.897498 1.179121
C -4.109975 2.327677 -0.146064
H -4.580727 3.034535 -0.853902
H -4.685441 1.381514 -0.144751
C -2.697574 2.020382 -0.642213
H -2.799461 1.504501 -1.612268
O -1.974707 3.257187 -0.843746
C -0.742244 3.199007 -0.082799
H 0.070838 2.809894 -0.718937
H -0.513625 4.222536 0.251840
C -1.836034 1.140541 0.308381
H -2.449076 0.538745 0.997605
C -1.028555 2.211698 1.048464
H -1.670446 2.673498 1.809523
H -0.129485 1.826961 1.520242
O -1.052221 0.260055 -0.543164
P 0.361122 -0.439440 -0.027668
O 0.665676 -1.528969 -1.051590
O 0.275376 -0.762685 1.460631
O 1.450017 0.799302 -0.163405
C 2.235146 0.989619 -1.365068
H 2.104123 2.025045 -1.715159
H 1.916262 0.276374 -2.143628
C 3.719323 0.748425 -1.063101
H 4.281204 0.775234 -2.010486
O 4.279512 1.788891 -0.222100
C 4.375321 1.346081 1.138648
H 5.423085 1.512902 1.447922
H 3.706925 1.954855 1.771828
C 3.980550 -0.571559 -0.317904
H 3.191311 -1.307641 -0.533399
C 3.973623 -0.145298 1.164694
H 2.966429 -0.291254 1.569226
H 4.684851 -0.737011 1.759341
O 5.273648 -1.073914 -0.742223
H 5.395793 -1.925264 -0.296573
H -3.040986 -3.267314 -1.967998
N -2.941714 -3.491796 -0.973209
H -1.905228 -3.748324 -0.776614
H -3.533253 -4.306902 -0.784801
C -3.344298 -2.315507 -0.114882
C -4.783395 -1.889141 -0.392444
H -2.626284 -1.519579 -0.340306
H -3.203975 -2.636721 0.923826
H -5.042711 -1.049091 0.266173
H -4.902899 -1.559683 -1.435150
H -5.486607 -2.711326 -0.194036
O -0.201238 -3.298888 2.253726
H -0.008571 -2.347859 2.009692
H 0.605129 -3.623809 2.681288
H 0.062077 -3.107682 -0.723396
O -0.367326 -3.957046 -0.419944
H -0.299464 -3.891507 0.568780
```

---

### Model W<sub>3</sub>

optimized ad B97D/6- 31+G(d,p) level including IEFPCM water solvation (see text), xyz format

57

```
model W3
H -5.271528 2.690209 1.451552
O -4.338463 2.571567 1.226010
C -4.271333 2.234462 -0.175351
H -4.744849 3.028029 -0.782249
H -4.790827 1.275394 -0.366926
C -2.819962 2.084045 -0.629629
H -2.842010 1.736376 -1.676605
O -2.159892 3.370296 -0.577617
C -0.966913 3.242659 0.235955
H -0.101176 3.006808 -0.405961
H -0.814962 4.204125 0.750110
C -1.959382 1.097653 0.210866
H -2.571510 0.358739 0.751529
C -1.253892 2.064774 1.166943
H -1.959549 2.359125 1.954280
H -0.359684 1.648927 1.621239
O -1.077727 0.404914 -0.722164
P 0.359414 -0.297271 -0.228143
O 0.760912 -1.202794 -1.383294
O 0.195494 -0.836239 1.187634
O 1.360711 1.006831 -0.109103
C 2.194454 1.428743 -1.215227
H 2.022383 2.501142 -1.394643
H 1.957534 0.843852 -2.119844
C 3.672524 1.211089 -0.868706
H 4.279941 1.425516 -1.762592
O 4.128029 2.118994 0.166615
C 4.178959 1.456318 1.437506
H 5.198112 1.618111 1.833031
H 3.445018 1.915809 2.121956
C 3.970419 -0.202348 -0.340153
H 3.236883 -0.928010 -0.722896
C 3.862749 -0.035270 1.189662
H 2.846118 -0.295980 1.502523
H 4.575237 -0.684733 1.718939
O 5.310346 -0.562688 -0.763545
H 5.458080 -1.470584 -0.459866
H -2.512945 -2.778957 -1.194549
N -2.298749 -3.518713 -0.480035
H -1.274128 -3.779973 -0.597448
H -2.885097 -4.336600 -0.667143
C -2.540883 -2.977935 0.907451
C -3.974112 -2.468690 1.055650
H -1.802737 -2.179947 1.053469
H -2.322640 -3.791284 1.609871
H -4.116294 -2.079390 2.073388
H -4.178475 -1.655994 0.343561
H -4.702841 -3.276065 0.889629
O 1.198587 -3.261575 1.852643
H 0.880262 -2.334148 1.667230
H 2.161567 -3.190354 1.932693
H 0.598615 -2.957829 -1.082272
O 0.421002 -3.877661 -0.754527
H 0.756224 -3.840524 0.175797
H -2.053069 -0.697179 -1.800710
O -2.607606 -1.365572 -2.269554
H -3.498557 -0.986135 -2.309293
```

---



## 2. Simulated anti-symmetric PO stretching signal of ( $W_3$ ) model

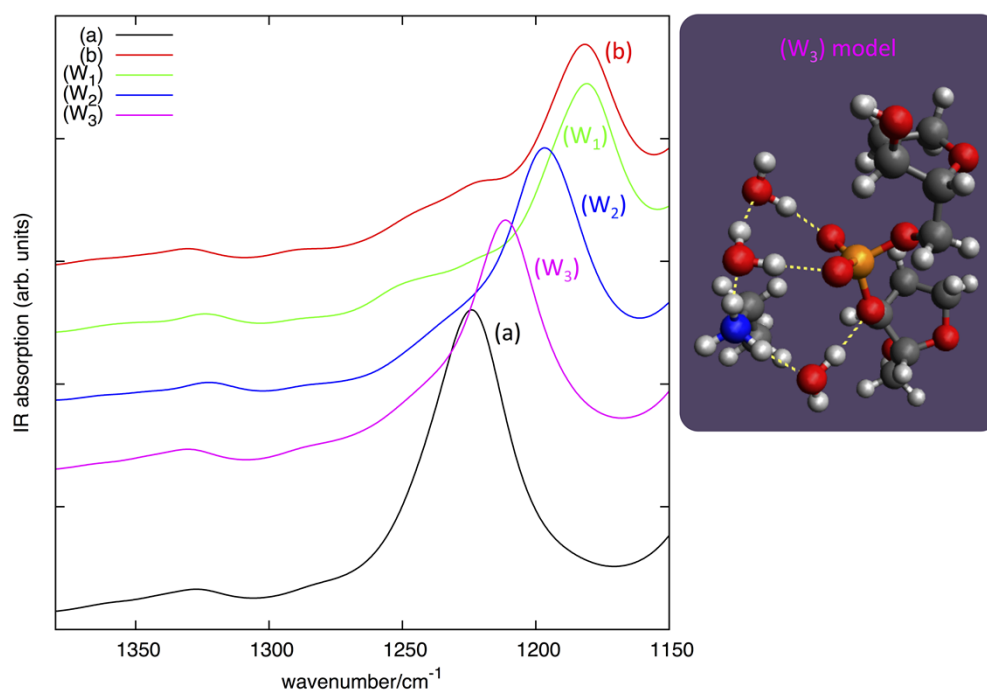

**Figure SI.1.** Left: simulated IR spectrum of model  $W_3$ , from DFT B97D/6-31+G(d,p) calculations including IEFPCM water solvation. The position of the anti-symmetric PO stretching mode varies monotonically with the content of water molecules shielding the direct  $\text{NH}_3^+:\text{PO}_4^-$  interaction (which is represented by model (b)). Right: ball and stick representation of the structure of model  $W_3$ , which compared with model  $W_2$  includes one additional water molecule hydrogen-bonded to the phosphodiester oxygen of the  $\text{PO}_4^-$  group.

## 3. Vibrational analysis of the molecular models considered in this work

Vibrational analysis is included as output of a custom code developed in our laboratory, which provides the contributions from internal coordinates to each normal mode ( $\mathbf{L}_R$  matrix). This is carried out based on the Hessian in Cartesian coordinates computed by Gaussian ( $\mathbf{F}_X$ ) and following Wilson's definition of internal coordinates (*i.e.*,  $\mathbf{R} = \mathbf{B} \mathbf{X}$ ) so that  $\mathbf{L}_R = \mathbf{B} \mathbf{L}_X$ , where the  $k$ -th column of  $\mathbf{L}_X$  satisfies the secular equation  $\mathbf{M}^{-1} \mathbf{F}_X (\mathbf{L}_X)_k = \omega_k^2 (\mathbf{L}_X)_k$ . The data contained in the  $\mathbf{L}_R$  matrix, limited to the PO stretching coordinates, has been used to plot Figure 6.

Since the full output is cumbersome, we prefer not listing it here. We provide the individual files for each model to help the analysis by the interested reader, as listed below:

1. dna-ca-gt.txt
2. model-a.txt
3. model-b.txt
4. model-W1.txt
5. model-W2.txt
6. model-W3.txt
